# Supplementary material for: NAC1 attenuates BCL6 negative autoregulation and functions as a BCL6 coactivator of FOXQ1 transcription in cancer cells
Source: Aging (Albany NY). 2020 May 14;12(10):9275–91. doi: 10.18632/aging.103203 (PMC7288929; doi:10.18632/aging.103203)
Supplement: Supplementary Table 1 [file aging-12-103203-s002..xlsx]

## Sheet: upregulated by NAC1
ProbeID	TargetID	SEARCH_KEY	ENTREZ_GENE_ID	log2siSCR	log2siNAC1	log2FC
7650020	AADACL1	NM_020792.3	57552	1032200441	9263604205	-1058400202
1690050	ACCN2	NM_020039.2	41	6600176194	5254169395	-1346006799
5570132	ACTB	NM_001101.2	60	1371183555	1258181673	-1130018819
5260546	ADAM17	NM_003183.4	6868	8782564871	7695003486	-1087561385
20100	ADAMTS6	NM_197941.2	11174	5894037565	4887687075	-100635049
4280681	AGFG1	NM_001135189.1	3267	6042594289	4557853349	-148474094
2340601	AMMECR1	NM_001025580.1	9949	7722928461	6402887706	-1320040755
4610433	ANGPTL4	NM_139314.1	51129	1151368699	9883739491	-1629947502
6560112	ANKRD1	NM_014391.2	27063	9600596302	8148058118	-1452538185
240682	ANKRD37	NM_181726.1	353322	8151360147	6765106491	-1386253656
130138	APCDD1L	NM_153360.1	164284	6405442877	5311011351	-1094431525
10753	ARFIP1	NM_001025593.1	27236	8712415942	7509915176	-1202500766
2510129	ATP13A3	XM_942079.1	79572	6720657535	5651728332	-1068929204
7050131	ATP6V1A	NM_001690.2	523	1103731887	9838759111	-1198559758
3990523	AZIN1	NM_015878.4	51582	8555040422	7427670765	-1127369656
1230682	BIRC5	NM_001168.2	332	89494407	7550498298	-1398942402
5080066	BRWD1	NM_001007246.1	54014	8540584157	6859444192	-1681139965
4900674	BST2	NM_004335.2	684	7110798652	5965039344	-1145759309
2070162	BZW1	XM_938633.1	9689	7335995071	6084653428	-1251341643
2900747	C10ORF10	NM_007021.2	11067	9170094579	7641457217	-1528637361
4900747	C11ORF75	NM_020179.1	56935	9302907809	8256528137	-1046379672
3170187	C13ORF37	NM_001071775.2	440145	95473143	7759839648	-1787474653
1110373	C15ORF48	NM_032413.2	84419	8613854677	711444728	-1499407396
5570575	C15ORF57	NM_001080791.1	90416	741377776	591331532	-1500462439
3870112	C1ORF19	NM_052965.1	116461	927616561	7711960872	-1564204738
7320441	C7ORF68	NM_013332.1	29923	9303250388	760746132	-1695789067
4200204	C9ORF37	NM_032937.3	85026	6959627688	5840917268	-111871042
3830075	CA12	NM_001218.3	771	6973470169	5872038156	-1101432014
6040626	CA9	NM_001216.1	768	5712053859	4509672403	-1202381456
6250131	CABYR	NM_153768.1	26256	655562765	5412657153	-1142970497
1240446	CAT	NM_001752.2	847	7557790751	6267118288	-1290672463
4220246	CCL20	NM_004591.1	6364	1242398718	106690779	-1754909278
1770397	CCNC	NM_005190.3	892	9659492392	8607025866	-1052466526
10142	CD164	NM_006016.3	8763	6690245383	5584401237	-1105844146
7150370	CEP120	NM_153223.1	153241	5775279573	4769641441	-1005638132
3940372	CEP170	NM_014812.1	9859	5671640142	4427802514	-1243837629
3370349	CFB	NM_001710.4	629	6836905088	5668812017	-1168093071
6250121	CHMP2B	NM_014043.2	25978	9077130039	7984661735	-1092468304
670500	CKAP5	NM_001008938.1	9793	6835010838	5572385381	-1262625457
5960296	CLDN1	NM_021101.3	9076	992037922	7922838331	-1997540889
2140379	CMAS	NM_018686.3	55907	9527707092	8240756555	-1286950537
2640551	CMPK1	NM_016308.1	51727	9221206964	8189170792	-1032036172
7570494	CNFN	NM_032488.2	84518	7085527783	6029402419	-1056125363
6180246	COX7A2L	NM_004718.2	9167	1193947553	1093521494	-1004260592
780762	CSNK1D	NM_139062.1	1453	9896813285	8829461784	-1067351501
650598	CSTF3	NM_001033505.1	1479	9782617766	8530670497	-1251947268
5690687	CTGF	NM_001901.1	1490	1234876071	1124950917	-1099251544
2000064	CTPS2	NM_175859.1	56474	7256139873	534026898	-1915870893
5270367	CTSC	NM_001814.2	1075	1122810781	1015616868	-1071939128
5720039	CXCL1	NM_001511.1	2919	8336027627	6794646005	-1541381621
4670390	CXCL2	NM_002089.1	2920	8449840759	7150434858	-12994059
5090491	CXORF38	NM_144970.1	159013	8322909281	6975764391	-134714489
130086	CYB561	NM_001017916.1	1534	7022009405	473499176	-2287017644
4060768	DBT	NM_001918.1	1629	8837368408	7815976957	-1021391452
2750719	DDX21	NM_004728.2	9188	1053052115	9375186536	-1155334616
6900707	DEFB103B	NM_018661.2	414325	8340596574	6477640226	-1862956348
2370129	DERL1	NM_024295.3	79139	1110339778	9663411707	-1439986075
6980300	DHRS11	NM_024308.2	79154	8490320253	72076753	-1282644953
6450307	DNMT3B	NM_006892.3	1789	6113069286	5111872811	-1001196475
1510685	DOK4	NM_018110.2	55715	6851970215	5503062516	-1348907699
3120379	DPY19L1	XM_938743.1	23333	1009284659	900553391	-1087312681
2810767	EBI3	NM_005755.2	10148	6715175525	5684301202	-1030874323
6370736	EIF1AX	NM_001412.3	1964	6418151285	494607825	-1472073034
6400044	EPDR1	NM_017549.2	54749	1092241174	9727780445	-1194631291
5310722	EPHB1	NM_004441.3	2047	6146038257	4815165067	-133087319
3140632	FAM117B	NM_173511.2	150864	6464630829	5025600637	-1439030193
60634	FAM18B	NM_016078.3	51030	8129374255	6932128609	-1197245646
2970433	FAM69A	NM_001006605.3	388650	8175762643	6966853885	-1208908758
1190246	FBXL10	NM_032590.3	84678	8475095863	7446816226	-1028279637
1660332	FBXW2	NM_012164.2	26190	6221446145	5176667042	-1044779102
650458	FILIP1L	NM_182909.1	11259	6206871913	5074021994	-1132849918
6510537	FKBP2	NM_057092.1	2286	616073283	5111872811	-104886002
6180438	FKBP9L	NM_182827.1	360132	6011064388	4887687075	-1123377313
4880646	FKSG30	NM_001017421.1	440915	1225206449	1081215139	-1439913098
5090747	FLJ12949	NM_023008.2	65095	655562765	5476104092	-1079523559
2630202	FLJ45248	NM_207505.1	401472	8026621416	6971172293	-1055449123
4590228	GLRX	NM_002064.1	2745	1081995369	9720017973	-1099935717
2100368	GOLT1B	NM_016072.2	51026	8316135368	6804359616	-1511775752
2710431	GTPBP3	NM_032620.1	84705	8280040926	7268824623	-1011216303
4610189	HERPUD1	NM_001010990.1	9709	9930098195	8873190952	-1056907243
5570563	HIATL1	NM_032318.1	84641	7014776034	5937056153	-1077719882
7150661	HK2	NM_000189.4	3099	8972025449	7709895135	-1262130314
5900482	HMGB2	NM_002129.2	3148	9157770606	8002070743	-1155699864
7570050	HMGB3	NM_005342.2	3149	6081461284	4901263254	-1180198031
6220300	HMGN1	NM_004965.6	3150	120297592	1064369181	-1386067393
2000184	HMGN2	NM_005517.2	3151	7050585585	6023870007	-1026715578
3130280	HNRNPH3	NM_012207.2	3189	8442394953	7036368247	-1406026706
4390022	HNRPH3	NM_012207.1	3189	8833894831	7166592017	-1667302814
240563	HS.129261	Hs.129261	NA	5699630174	4544757238	-1154872936
5690341	HS.24119	Hs.24119	NA	6344610304	5335139249	-1009471055
6450386	HS.276854	Hs.276854	NA	5900089574	4632955866	-1267133708
2120450	HS.356079	Hs.356079	NA	6290345295	513350044	-1156844855
2030719	HS.539174	Hs.539174	NA	5977685875	4937400508	-1040285367
4880243	HS.542632	Hs.542632	NA	6151122276	5108267603	-1042854673
6290019	HS.544736	Hs.544736	NA	5946444281	4503783126	-1442661155
2030168	HS.546114	Hs.546114	NA	5624278749	4564544141	-1059734608
1710437	HS.551847	Hs.551847	NA	7614840182	6432420102	-1182420081
2450435	HS.568741	Hs.568741	NA	7901878803	6513612462	-1388266341
7150139	HS.570189	Hs.570189	NA	7108709571	60962979	-1012411672
2640102	HS.572761	Hs.572761	NA	5935878345	4701702331	-1234176014
4250192	HS.576633	Hs.576633	NA	8463801067	7365165042	-1098636024
3290598	HS.580943	Hs.580943	NA	6845084887	5277928932	-1567155955
2750372	HS.583307	Hs.583307	NA	5968499393	4960055716	-1008443677
4480019	HSD11B1L	NM_198707.1	374875	5850949086	4682124607	-1168824479
870131	HSPA5	NM_005347.2	3309	1129774323	1006880206	-1228941165
3990170	IFI27	NM_005532.3	3429	8921521748	7003576469	-1917945279
2190674	IGFBP5	NM_000599.2	3488	73497696	494607825	-240369135
5420386	IL13RA2	NM_000640.2	3598	5684301202	4580530334	-1103770868
4040576	IL6	NM_000600.1	3569	7893105567	5434052838	-2459052729
1570553	IL8	NM_000584.2	3576	1053757535	8469103334	-2068472015
6020398	IVD	NM_002225.2	3712	6245414052	5226693007	-1018721044
4670343	JAG2	NM_002226.3	3714	7421161922	5361569325	-2059592597
5340162	KIAA1598	NM_018330.3	57698	8306142406	6623043176	-1683099229
430446	KRT81	NM_002281.2	3887	6880106423	5869572982	-1010533441
2450612	LANCL1	NM_006055.1	10314	9114569286	8105477511	-1009091775
4390398	LCN2	NM_005564.2	3934	872917107	7572644967	-1156526103
2680382	LEPR	NM_001003679.1	3953	6794646005	5584401237	-1210244768
2470608	LLGL1	NM_004140.3	3996	8499717187	6488928005	-2010789182
4850324	LOC100128230	XR_037867.1	100128230	5921669082	4763520214	-1158148868
4040343	LOC100129673	XM_001715544.1	100129673	8991784591	7867079209	-1124705383
1770347	LOC100130311	XM_001724111.1	100130311	7079407	4655744843	-2423662158
6380546	LOC100131471	XR_038234.1	100131471	5986814247	4729102218	-1257712029
650554	LOC100132240	XR_038313.1	100132240	7160049979	591331532	-1246734659
5570553	LOC100132510	XM_001725190.1	100132510	6183242503	4894461624	-1288780879
2760209	LOC100132992	XR_037398.1	100132992	1134219565	1009726539	-1244930259
4590397	LOC100133836	XM_001713608.1	100133836	8500314918	6937435125	-1562879794
160056	LOC285423	XM_938311.1	285423	5756731061	4648492798	-1108238263
1980369	LOC401152	NM_001001701.1	401152	7828566265	5849698854	-1978867411
6580398	LOC401805	XR_038835.1	401805	8051577159	6579205921	-1472371237
2340739	LOC402221	XM_938988.1	402221	8993271599	7958655415	-1034616184
1660181	LOC440145	NM_001071775.1	440145	8131176384	62005104	-1930665984
7200474	LOC441155	XM_943614.1	441155	5857183684	4792945671	-1064238013
2120563	LOC441711	XR_037852.1	441711	7671489466	5910919624	-1760569842
3850168	LOC644936	NR_004845.1	644936	7673964161	5971951182	-1702012979
70121	LOC645638	XR_040455.1	645638	6722024789	5687100019	-1034924771
6940674	LOC653375	XM_001722348.1	653375	6086777607	5025600637	-106117697
1940131	LOC653569	XM_928141.1	653569	5668812017	4415602934	-1253209083
1070075	LOC654135	XM_945932.1	654135	5962728022	4894461624	-1068266398
4180397	LOC729020	XM_001725597.1	729020	6086777607	4932184255	-1154593352
2070487	LOC730236	XM_001715647.1	730236	5665978517	4625336053	-1040642464
3940017	LOX	NM_002317.3	4015	8856480646	6944187391	-1912293255
6660162	LRG1	NM_052972.2	116844	6833114097	5612570363	-1220543734
4780411	LRP8	NM_033300.2	7804	8100886784	6891391336	-1209495448
4280373	MAG	NM_080600.1	4099	5578404843	4540475706	-1037929138
1300470	MAMDC2	NM_153267.3	256691	686471493	5716172527	-1148542403
4540414	MED14	NM_004229.3	9282	6649151368	5648862228	-100028914
6860524	METTL3	NM_019852.2	56339	8294931805	7122752514	-1172179292
1430463	MICAL2	NM_014632.2	9645	5849698854	4595845852	-1253853002
580551	MIR23B	NR_029664.1	407011	5794894866	4571330939	-1223563927
7400400	MMP3	NM_002422.3	4314	6156188442	5027370386	-1128818056
5560370	MRI1	NM_032285.1	84245	8485296834	7476282103	-1009014731
7000692	MRPL52	NM_181306.1	122704	8887883792	7810364104	-1077519688
2450152	MST4	NM_001042453.1	51765	7756841218	6644832681	-1112008537
6620528	MT1X	NM_005952.2	4501	1340801358	116948879	-1713125681
6770348	MTFR1	NM_014637.2	9650	8794717073	7782786673	-1011930399
5310161	MTHFD2L	NM_001004346.2	441024	7091622707	6037112325	-1054510382
1230070	NDRG1	NM_006096.2	10397	1377837674	1264131068	-1137066061
7200762	NDRG3	NM_022477.2	57446	7892194938	6708293587	-1183901351
4060438	NDUFA4L2	NM_020142.3	56901	5987951248	4544757238	-144319401
3930632	NEU2	NM_005383.1	4759	5460046542	4345331473	-1114715069
6510598	NHLRC3	NM_001017370.1	387921	6208823671	5144307246	-1064516426
3390722	NICN1	NM_032316.2	84276	7141266302	6022206141	-1119060162
6280482	NIP7	NM_016101.3	51388	1006024699	8403087494	-1657159495
7210647	NKD2	NM_033120.2	85409	6162244451	4974109647	-1188134804
4290037	NOV	NM_002514.2	4856	7041305505	5578404843	-1462900661
780142	NOX5	NM_024505.2	79400	5822555854	476047437	-1062081483
6330348	NT5DC3	NM_016575.1	51559	8934037887	7690820095	-1243217792
2760129	OGG1	NM_016821.1	4968	7011425284	5962728022	-1048697262
1510682	OPA1	NM_130835.1	4976	8235381029	6965411538	-1269969491
1240037	PARM1	NM_015393.2	25849	6344610304	5129896789	-1214713515
3130168	PDCD4	NM_145341.2	27250	5594838246	4582857157	-101198109
1050168	PI3	NM_002638.2	5266	7320057765	5409345236	-1910712528
1450072	PIGF	NM_173074.1	5281	9061013906	7872629995	-1188383911
50538	PIM3	XM_938171.1	415116	6480874328	5412657153	-1068217175
6480181	PKD1L2	NM_001076780.1	114780	6086777607	5005973533	-1080804074
5050577	PNPLA7	NM_152286.2	375775	5811683148	4696054873	-1115628275
3190010	POTEE	NM_001083538.1	445582	6469523111	5249747474	-1219775637
4850138	POTEF	NM_001099771.1	728378	1314641239	1194557834	-1200834051
2900072	PPIF	NM_005729.3	10105	6869966483	5825738219	-1044228263
2940537	PPP3CA	NM_000944.2	5530	6622311161	5492015399	-1130295763
670128	PRDM10	NM_020228.2	56980	6336153185	514070577	-1195447415
770021	PRKRA	NM_003690.3	8575	8797151494	7579638071	-1217513423
1070747	PROKR2	NM_144773.2	128674	5706544905	4575909094	-1130635811
650068	PRPF40A	XM_943716.1	55660	6589354648	5412657153	-1176697495
4900561	PSG1	NM_006905.2	5669	5694074586	4585194805	-1108879781
4290397	PSG2	NM_031246.1	5670	5777910259	4580530334	-1197379925
3440095	PSG3	NM_002785.2	5671	8106786469	6466263434	-1640523035
3400474	PSG4	NM_002780.3	5672	7339116965	6137866377	-1201250587
2230338	PSG7	NM_002783.1	5676	5977685875	4923561811	-1054124064
4120243	PSG9	NM_002784.2	5678	7188763968	582446619	-1364297778
1820632	PTGS2	NM_000963.1	5743	7662972427	6376215846	-1286756581
4050349	RAB6A	NM_198896.1	5870	6521485933	5126292618	-1395193314
2100292	RBBP7	NM_002893.2	5931	9194123279	7334655046	-1859468233
2810491	RFP	NM_030950.2	5987	6956727045	560815772	-1348569325
5960475	RHPN2	NM_033103.3	85415	9279303458	8185458788	-1093844669
2630376	RNF135	NM_032322.3	84282	8022466069	6699991694	-1322474375
2260603	RNF145	NM_144726.1	153830	9361434373	8183475141	-1177959232
1090433	RNF41	NM_194359.1	10193	6441578229	4974109647	-1467468582
5910041	RPL23AP7	NR_000029.1	118433	7265546678	6222412545	-1043134133
70201	RUNX2	NM_001015051.2	860	5926421066	4723254208	-1203166858
4050291	SAA2	NM_030754.2	6289	9277561052	7940270767	-1337290284
110327	SEC62	NM_003262.3	7095	6818169385	4766575922	-2051593463
2030279	SERINC3	NM_006811.2	10955	6191162053	5137103467	-1054058586
770408	SERPINE1	NM_000602.1	5054	1182470728	1080208633	-1022620958
2070367	SERTAD2	NM_014755.1	9792	1129774323	1026240932	-1035333907
3710040	SFN	NM_006142.3	2810	9059662733	8013840237	-1045822496
6400717	SFTA1P	NR_027082.1	207107	9602360573	8329875738	-1272484835
3060474	SLC23A2	NM_005116.5	9962	664627368	541926417	-122700951
3890402	SLC25A24	NM_013386.2	29957	713614737	5775279573	-1360867796
7560377	SLC37A3	NM_207113.1	84255	6084653428	5045274428	-1039379
5960332	SLC39A10	NM_020342.1	57181	6846965965	5840917268	-1006048697
2450725	SLC3A2	NM_001013251.1	6520	8437097492	7418845255	-1018252237
270152	SLC7A5	NM_003486.5	8140	1160546457	1018313005	-1422334517
2690703	SMN1	XM_936952.1	6606	6472775439	5147907795	-1324867644
4040070	SMN2	NM_022875.1	6607	6049145267	4821593998	-122755127
1300608	SNHG9	NR_003142.2	735301	7325689596	5838398448	-1487291148
4590743	SNX1	NM_003099.3	6642	5771324813	4757438443	-1013886371
3420373	SOD2	NM_001024466.1	6648	7656193929	5578404843	-2077789086
3870661	SPINK5L3	XM_376433.2	153218	6049145267	4828057659	-1221087608
360500	SRGN	NM_002727.2	5552	6653457164	5361569325	-1291887839
3780717	SRXN1	NM_080725.1	140809	1145271367	1042858808	-1024125589
2070100	ST6GALNAC3	NM_152996.1	256435	6092074412	4894461624	-1197612788
4260731	STMN1	NM_005563.3	3925	6966565531	5569366976	-1397198555
2570692	STT3A	NM_152713.2	3703	9439763802	818173721	-1258026592
1030674	STT3B	NM_178862.1	201595	8823105137	760746132	-1215643816
1260564	STXBP1	NM_003165.1	6812	5965039344	456679571	-1398243633
3930286	SUCLA2	NM_003850.1	8803	8870265171	7535413092	-1334852078
70162	TDG	NM_003211.3	6996	845365218	7423474874	-1030177306
360377	TGFA	NM_003236.1	7039	6835010838	554501051	-1290000328
2940446	TGM2	NM_198951.1	7052	8661217682	7243342604	-1417875079
4070037	TMED10	NM_006827.4	10972	9558263248	8361582871	-1196680377
3130220	TMEM158	NM_015444.1	25907	9970562803	8899108269	-1071454534
6280520	TMEM45A	NM_018004.1	55076	7481135099	6300447895	-1180687205
2900279	TMEM75	NM_001037234.1	641384	6283879338	4523762825	-1760116513
1580707	TMEM80	NM_174940.1	283232	5951115549	4937400508	-1013715042
4830471	TNIP3	NM_024873.2	79931	6311388823	4901263254	-1410125569
870195	TSEN15	NM_001127394.2	116461	7474660803	6029402419	-1445258384
3710609	TSPAN17	NM_012171.1	26262	998785761	8959763515	-1028094095
7050543	TUBB2B	NM_178012.3	347733	8538645664	7355066566	-1183579098
2320133	TXNRD1	NM_182743.1	7296	1151146493	1048896252	-1022502414
6550358	UBA52	NM_003333.3	7311	8184467306	6544851765	-163961554
2070019	UBA6	NM_018227.3	55236	8770392037	776067144	-1009720597
4220437	UCN2	NM_033199.3	90226	7646866175	6493738719	-1153127456
2190408	UPK1A	NM_007000.2	11045	6271793702	5111872811	-1159920891
4040747	UQCR	NM_006830.2	10975	7042400382	6027192	-1015208382
5890288	VEGFB	NM_003377.3	7423	7411449196	6390043527	-1021405669
2850619	VGF	NM_003378.2	7425	7638564126	6490934419	-1147629708
2970148	WASH1	NM_182905.3	375690	7384720802	6309571087	-1075149715
6960576	WDR23	NM_025230.3	80344	6239697964	5223136484	-101656148
1980201	WWP1	NM_007013.3	11059	9658421637	8510042969	-1148378668
4050735	XPOT	NM_007235.3	11260	7643983921	6339720122	-13042638
3520475	YDJC	NM_001017964.1	150223	6402887706	5126292618	-1276595088
2690278	ZBTB25	NM_006977.2	7597	6523055484	5397703426	-1125352058
4830139	ZHX1	NM_001017926.1	11244	5445465325	4418605119	-1026860206
6280228	ZMYM2	NM_197968.1	7750	591331532	4887687075	-1025628245
6560338	ZNF512	NM_032434.2	84450	8741442407	762656842	-1114873987

## Sheet: dowregulated by NAC1
ProbeID	TargetID	SEARCH_KEY	ENTREZ_GENE_ID	log2siSCR	log2siNAC1	log2FC
6110592	ABHD11	NM_148914.2	83451	4857557168	5919287214	1061730046
650050	AKAP13	NM_007200.3	11214	4928724607	6188197314	1259472708
3870092	AKT1S1	NM_032375.2	84335	5232036231	6250160219	1018123987
2320433	ATRN	NM_139322.1	8455	5746024848	6798539301	1052514453
4230066	C16ORF53	NM_024516.2	79447	5809112964	7174603243	136549028
6960408	C19ORF63	NM_175063.3	284361	478356138	5935878345	1152316965
2470528	C9ORF116	NM_144654.2	138162	6418151285	7464077707	1045926423
1780762	C9ORF86	NM_024718.2	55684	6086777607	7109232125	1022454518
4860133	CCDC146	NM_020879.1	57639	4593459492	5640230992	10467715
2750192	CCDC90B	NM_021825.3	60492	6268054584	7334655046	1066600463
6650201	CCDC97	NM_052848.1	90324	6333024865	7439770293	1106745428
4920593	CDKN2C	NM_078626.1	1031	4970589383	6132735347	1162145963
3400450	CHKB	NM_005198.3	1120	5255058644	6292187401	1037128757
2490161	CLEC2B	NM_005127.2	9976	4780452194	5803958898	1023506704
1940315	CLMN	NM_024734.2	79789	5958094246	708499657	1126902325
4890195	COPS2	NM_004236.1	9318	6162244451	721521951	105297506
2680746	CPLX1	NM_006651.3	10815	578968999	7143308801	135361881
4890671	DHRS2	NM_182908.3	10202	5731175043	6885912403	115473736
5390433	DICER1	NM_030621.2	23405	4970589383	660388902	1633299636
4570669	DNER	NM_139072.2	92737	5199967236	6531657623	1331690387
7330044	DYNLT3	NM_006520.1	6990	6838166542	8053750566	1215584024
870338	EGR1	NM_001964.2	1958	7441846201	8489517681	104767148
1260241	EIF4EBP2	NM_004096.3	1979	6167773549	8427387054	2259613506
4260435	ERCC2	NM_000400.2	2068	7705409197	88403616	1134952403
4570398	F2R	NM_001992.2	2149	9143300829	1020990135	1066600517
6250139	F2RL3	NM_003950.2	9002	4499906086	5594838246	1094932161
1070253	FAM105B	NM_138348.3	90268	5997015105	7247620986	1250605881
4860646	FAM20C	NM_020223.1	56975	7613367426	871052306	1097155634
2510753	FAM38B	NM_022068.1	63895	5104662506	6164257485	1059594978
1300392	FAM83H	NM_198488.1	286077	4880940382	6268990272	138804989
770687	FASTK	NM_033015.2	10922	7401883921	8456016377	1054132456
6250242	FLNA	NM_001456.1	2316	5803958898	6907704384	1103745487
2650364	FOXM1	NM_202002.1	2305	5731175043	6914297918	1183122875
3830326	GABPB1	NM_181427.3	2553	578968999	6799834735	1010144745
6860291	GAS8	NM_001481.1	2622	5578404843	6615706257	1037301414
3840403	GCET2	NM_001008756.1	257144	5343689502	6508075354	1164385852
4850088	GIPC1	NM_005716.2	10755	499531831	6077194075	1081875766
7330131	GXYLT1	XM_290597.6	283464	6433255065	7645786005	1212530939
6510689	HABP4	NM_014282.1	22927	7025335691	8116436021	1091100331
5360736	HABP4	NM_014282.1	22927	6273659633	7433107244	1159447611
2970754	HAUS8	NM_033417.1	93323	550620668	6708293587	1202086907
3440544	HCCS	NM_005333.2	3052	5503062516	6522663256	101960074
4890279	HIST2H4A	NM_003548.2	8370	5331706645	6499331019	1167624374
2470328	HOXB7	NM_004502.2	3217	6449028241	7692564649	1243536409
3290609	HS.193784	Hs.193784	NA	5030946395	6780936131	1749989735
240392	HS.202577	Hs.202577	NA	6421521372	8077711436	1656190065
6580674	HS.21177	Hs.21177	NA	5969650912	7304398858	1334747946
5670685	HS.37204	Hs.37204	NA	4880940382	6082526117	1201585734
6590678	HS.493239	Hs.493239	NA	4471154841	5706544905	1235390064
3460072	HS.539765	Hs.539765	NA	4834555442	6029402419	1194846977
10711	HS.542848	Hs.542848	NA	4963562307	5984537564	1020975258
1470450	HS.553068	Hs.553068	NA	4818375154	60599979	1241622746
650477	HS.553351	Hs.553351	NA	4850945019	5908519947	1057574927
1030138	HS.555138	Hs.555138	NA	444052299	55264977	108597471
3800477	HS.570237	Hs.570237	NA	5030946395	6034913695	1003967299
2060279	HS.577721	Hs.577721	NA	4434096354	5703782687	1269686333
4040132	HS.584115	Hs.584115	NA	4530996372	562719183	1096195458
4570524	ICK	NM_014920.2	22858	5397703426	6406293595	1008590169
6370136	IFNE	NM_176891.4	338376	4435690463	5840917268	1405226805
3290102	IP6K3	NM_054111.4	117283	4660401086	5750048593	1089647506
5890253	ITGB3BP	NM_014288.3	23421	6201980933	7457526234	1255545301
4480110	KCNJ10	NM_002241.2	3766	4967073566	618522647	1218152904
3890164	KIAA0895	NM_015314.1	23366	5005973533	6157199544	1151226011
870736	KIAA1545	XM_495939.2	57666	4887687075	5962728022	1075040947
540020	LGALS8	NM_006499.3	3964	6510451003	7566379146	1055928143
6290142	LOC100008589	NR_003287.1	100008589	1198080639	1334043677	1359630385
2900615	LOC100129203	XM_001718910.1	100129203	476047437	6011623522	1251149152
1170575	LOC100129882	XM_001716882.1	100129882	8387124296	1049457332	2107449029
3780767	LOC100132564	XM_001713808.1	100132564	1134441671	1235827144	1013854738
5360647	LOC100133463	XM_001720896.1	100133463	4511655291	5862152145	1350496853
4280093	LOC440157	NM_001013701.1	440157	5331706645	6544851765	1213145121
2850161	LOC441009	XM_944418.3	441009	494607825	5948781805	1002703555
110435	LOC441550	XR_038097.1	441550	5288421325	6302277154	101385583
6130347	LOC642325	XM_925864.1	642325	4870874232	6452327048	1581452816
3990255	LOC644360	XM_927518.1	644360	5415963471	6423623686	1007660215
6590750	LOC644380	XM_929628.1	644380	4824821525	5946444281	1121622757
7610437	LOC644573	XM_927687.1	644573	4887687075	596619361	1078506535
3180221	LOC645676	XM_935153.1	645676	4532037084	6046964911	1514927828
7210201	LOC646008	XM_928970.1	646008	477118221	5830181853	1058999643
6290754	LOC652234	XM_941628.1	652234	4497982203	550620668	1008224477
5960047	LOC652492	XM_945574.1	652492	4850945019	5997015105	1146070086
10291	LOC653337	XM_928370.1	653337	4998866546	6338383554	1339517008
4780711	LOC728408	XR_039142.1	728408	5775279573	7073260139	1297980566
730504	LOC729530	XM_001718966.1	729530	4578214319	5709301957	1131087638
730709	LOC730525	NM_199327.1	730525	5962728022	713896503	1176237008
7150270	LRRC26	XM_939320.1	389816	4663078282	5703782687	1040704406
2690475	MAP4K5	NM_006575.3	11183	6958468131	8045037222	1086569091
3800279	ME3	NM_006680.2	10873	6304104098	7557024858	125292076
1980050	MEX3D	NM_203304.1	399664	5223136484	6537881665	131474518
3940619	MGC40170	XR_000908.1	253128	4884310199	6082526117	1198215918
2060564	MNAT1	NM_002431.2	4331	7421161922	8469510394	1048348473
3440053	MPRIP	NM_201274.2	23164	5946444281	7101373874	1154929592
5550500	MXRA7	NM_001008529.1	439921	5357321461	6718604222	1361282761
160692	MYOM1	NM_003803.2	8736	4630404917	5794894866	1164489948
50521	NECAB3	NM_031232.2	63941	5331706645	6643390242	1311683597
6110167	NPAS2	NM_002518.3	4862	5077621812	6469116054	1391494241
3440037	PALM	NM_002579.2	5064	515870289	6193135166	1034432276
770369	PP14571	NR_024014.1	100130449	473499176	5986814247	1251822486
580390	PPARGC1A	NM_013261.2	10891	5020226368	6032711709	1012485341
4200612	PPIL1	NM_016059.3	51645	776067144	8831996621	1071325181
4390754	PPL	NM_002705.3	5493	4824821525	585469304	1029871515
6020523	PPP2R2B	NM_181676.1	5521	8017602989	9108440057	1090837068
3440315	PPP2R3B	NM_199326.1	28227	4821593998	5960412993	1138818996
1770224	PRICKLE1	NM_153026.1	144165	6623043176	7884889142	1261845966
5670156	PRKACB	NM_207578.1	5567	4780452194	6072914208	1292462014
4390370	PRPF38A	NM_032284.2	84950	567868768	6789438547	1110750866
990747	PSCD2	NM_004228.4	9266	6498533444	7563522024	106498858
1510181	PTGES	NM_004878.3	9536	7190246517	8240756555	1050510039
3520095	RAD23A	NM_005053.2	5886	8690758271	9744947682	1054189411
4200209	RBKS	NM_022128.1	64080	5451958252	6608331835	1156373583
7550008	RNF216	NM_019011.4	54476	7944962125	9024634692	1079672567
3290446	RPL36	NM_015414.2	25873	6508471567	7545101227	1036629659
5310066	SCARNA11	NR_003012.1	677780	591570705	7345562332	1429855283
360292	SCARNA13	NR_003002.1	677768	8273645067	1022763725	1953992184
3140521	SCARNA14	NR_004388.1	692149	4815165067	6132735347	1317570279
2030646	SCARNA16	NR_003013.1	677781	6792044625	8185458788	1393414163
2750670	SCARNA18	NR_003139.1	677765	6696518422	8037506916	1340988493
5960176	SCARNA22	NR_003004.1	677770	5541939694	6859444192	1317504498
2710427	SCARNA23	NR_003007.1	677773	4664425563	6953238557	2288812993
2600403	SCARNA8	NR_003009.1	677776	5013093778	69866124	1973518621
3390139	SDHD	NM_003002.1	6392	8819117962	9890633201	1071515239
2940706	SETD3	NM_032233.2	84193	9621076954	1089054375	1269466796
2690528	SHMT1	NM_148918.1	6470	6594962133	7714367167	1119405034
4010452	SLC38A6	NM_153811.1	145389	6221446145	7324789979	1103343835
1500193	SMPD1	NM_001007593.1	6609	5681497094	6745072023	1063574929
4670437	SMYD5	NM_006062.1	10322	4953056984	6423623686	1470566701
4920435	SNORA11E	NR_003712.1	100124542	4754412481	5820642992	1066230511
6510156	SNORA12	NR_002954.1	677800	8883308333	1080499227	1921683939
5910577	SNORA21	NR_002576.1	619505	494607825	5946444281	1000366031
1780008	SNORA28	NR_002964.1	677811	5137103467	6279707296	1142603829
5870475	SNORA62	NR_002324.1	6044	6504107225	7527224478	1023117253
1240577	SNORA67	NR_002912.1	26781	8011466053	9447843041	1436376989
1090196	SNORA79	NR_003021.2	677845	6042594289	7383857263	1341262974
2750523	SNORA9	NR_002952.1	677798	4571330939	5600771683	1029440744
1240324	SNORD49A	NR_002744.1	26800	5365808771	6669844687	1304035915
3420739	SNTB1	NM_021021.2	6641	7666349769	8866715479	1200365709
5260403	ST3GAL5	NM_003896.2	8869	7439770293	8574660536	1134890243
5090097	SYS1	NM_033542.2	90196	6544851765	7719167749	1174315984
4050056	TBC1D16	NM_019020.2	125058	6614234385	7826343242	1212108857
3890097	TCF19	NM_001077511.1	6941	4607941509	5847195283	1239253774
3420678	TERC	NR_001566.1	7012	6294946158	7816777013	1521830855
5820743	TMC7	NM_024847.2	79905	4821593998	6042594289	1221000291
3870193	TMEM180	NM_024789.3	79847	5030946395	6049145267	1018198872
7610369	TMEM184B	NM_012264.3	25829	6457671575	7919713748	1462042173
6110259	TMEM198	NM_001005209.1	130612	4737952009	5830181853	1092229844
1580279	TOX2	NM_001098796.1	84969	5045274428	6049145267	100387084
3850026	TP53AP1	NM_007233.1	11257	5239130562	642572294	1186592378
4220255	VTRNA1-1	NR_026703.1	56664	521068126	6255835085	1045153825
7560435	XKR8	NM_018053.2	55113	525858525	6327646198	1069060947
3440189	ZBTB20	NM_015642.2	26137	5763382555	7237857254	1474474698
4560300	ZCCHC11	NM_015269.1	23318	4850945019	586462999	1013684971
1990280	ZNF280D	NM_001002844.1	54816	7187527345	8424660577	1237133231
6660347	ZNF322A	NM_024639.2	79692	5665978517	6819766627	115378811

## Sheet: upregulated by BCL6
ProbeID	TargetID	SEARCH_KEY	ENTREZ_GENE_ID	log2siSCR	log2siBCL6	log2FC
4290053	ADCK4	NM_024876.2	79934	6280496229	5266902968	-1013593261
7560440	ADORA2A	NM_000675.3	135	6955768523	589203894	-1063729583
7100093	AMMECR1	NM_001025580.1	9949	6398918185	5256462714	-1142455472
990092	ANGPTL4	NM_139314.1	51129	6718158918	535765965	-1360499269
240682	ANKRD37	NM_181726.1	353322	8203030824	6112391732	-2090639091
130138	APCDD1L	NM_153360.1	164284	642894979	507307635	-135587344
730414	APOE	NM_000041.2	348	8016865135	6902498192	-1114366943
5960382	AQP7P2	XR_001077.1	389756	5412584862	4360458023	-1052126839
4220484	ARFIP1	NM_001025595.1	27236	6177124617	5142020201	-1035104415
7050131	ATP6V1A	NM_001690.2	523	1111021263	9955483117	-1154729511
3990523	AZIN1	NM_015878.4	51582	862007392	7508073685	-1112000234
2680470	BAIAP2	NM_006340.1	10458	656544799	5532084447	-1033363543
3800243	BBS10	NM_024685.2	79738	6624396391	5350911081	-1273485309
6280458	BCL6	NM_001706.2	604	8624010232	6963881047	-1660129186
2640735	BHLHB2	NM_003670.1	8553	103130363	8642539872	-1670496424
7210154	BIRC3	NM_001165.3	330	6237166086	5188061041	-1049105045
2640192	BNIP3L	NM_004331.2	665	8772925526	7291264703	-1481660823
4890598	BRSK1	NM_032430.1	84446	8565997721	7553515684	-1012482037
2900747	C10ORF10	NM_007021.2	11067	9237413635	6485188597	-2752225037
1110373	C15ORF48	NM_032413.2	84419	8681362136	7579958544	-1101403592
4540537	C1ORF201	NM_178122.2	90529	5946855063	473698651	-1209868553
1010446	C1QTNF6	NM_031910.3	114904	6330651716	4868384185	-146226753
7320441	C7ORF68	NM_013332.1	29923	9367054755	7814968238	-1552086517
150474	CA12	NM_001218.3	771	9431153251	8285102578	-1146050673
6040626	CA9	NM_001216.1	768	5726262046	4633295023	-1092967024
1070402	CANX	NM_001024649.1	821	9431153251	8428926275	-1002226975
620717	CCL5	NM_002985.2	6352	5715336566	453312041	-1182216156
3120091	CD300C	NM_006678.2	10871	6206725381	5101340498	-1105384883
6220382	CD68	NM_001251.2	968	6949945806	5521267504	-1428678302
770167	CD79B	NM_001039933.1	974	7710187944	6685943031	-1024244913
150463	CDCP1	NM_178181.1	64866	8900671233	7422150616	-1478520617
1780274	CECR7	XM_927968.1	27438	608926956	5088929079	-1000340481
3370349	CFB	NM_001710.4	629	6860903293	5327193343	-153370995
5960296	CLDN1	NM_021101.3	9076	9984539802	8227063333	-1757476469
5870136	CLIC3	NM_004669.2	9022	6815514022	5676450797	-1139063225
1500131	CPEB4	NM_030627.1	80315	6670446726	5353434812	-1317011914
7510114	CSDE1	NM_001007553.1	7812	6975391801	5894465969	-1080925832
4260379	CTNNB1	XM_945650.1	1499	8585845902	7552555412	-103329049
4670390	CXCL2	NM_002089.1	2920	8509914342	6771294091	-1738620251
6280224	CYP26B1	NM_019885.2	56603	7407142023	6275848978	-1131293045
5820400	CYP4B1	NM_000779.2	1580	5510367507	4501372129	-1008995378
6960349	DCP2	NM_152624.4	167227	9793904343	83672409	-1426663443
4180139	DDB1	XM_943551.1	1642	700938307	6008658006	-1000725065
540161	DNAJC25-GNG10	NM_004125.2	552891	6652274316	5580679269	-1071595047
3710148	DPM2	NM_152690.1	8818	6154518541	5149101603	-1005416938
4560484	DPP3	NM_005700.2	10072	5791468131	4765995542	-1025472589
4290446	EIF4G2	NM_001418.3	1982	9223483383	7703801202	-151968218
610270	ELL2	NM_012081.3	22936	6970223324	5884733336	-1085489988
2510356	EMR1	NM_001974.3	2015	6506767039	5310095456	-1196671583
50402	ENO2	NM_001975.2	2026	9694506251	8117046711	-157745954
1690553	EPCAM	NM_002354.2	4072	7140167239	6048437158	-1091730081
1980730	F2RL2	NM_004101.2	2151	7929466767	6754689862	-1174776905
2710601	FAM160B2	NM_022749.4	64760	584889373	4728451442	-1120442288
650458	FILIP1L	NM_182909.1	11259	6228534083	5172132012	-1056402072
6180438	FKBP9L	NM_182827.1	360132	6034198627	4831658261	-1202540366
2630202	FLJ45248	NM_207505.1	401472	8070041524	7007702394	-106233913
1260468	GAL3ST1	NM_004861.1	9514	6969072254	5464519671	-1504552584
6280176	GBE1	NM_000158.1	2632	8253777562	7067544133	-1186233429
6380286	GTF2IP1	NR_002206.1	2970	6913909108	589203894	-1021870167
4220669	HDAC11	NM_024827.1	79885	5960819421	470206105	-1258758372
10332	HIPK2	NM_022740.2	28996	8634938821	7422150616	-1212788205
270674	HPCAL1	NM_134421.1	3241	5649483221	4489556809	-1159926413
6200736	HRB	NM_004504.3	3267	7749770267	6691885943	-1057884324
2230093	HS.171274	Hs.171274	NA	5737107499	4683177626	-1053929873
6450386	HS.276854	Hs.276854	NA	5922087788	4444337365	-1477750423
2120450	HS.356079	Hs.356079	NA	6313068148	5256462714	-1056605434
4480196	HS.36808	Hs.36808	NA	5791468131	4430569717	-1360898414
6290019	HS.544736	Hs.544736	NA	5965444384	4644431988	-1321012395
430594	HS.562647	Hs.562647	NA	5836326984	4780899077	-1055427907
2340414	HS.568777	Hs.568777	NA	7331232316	5979231043	-1352001273
2640102	HS.572761	Hs.572761	NA	595501734	479752246	-115749488
3990170	IFI27	NM_005532.3	3429	8988571669	7409053185	-1579518484
7400497	IGFBP1	NM_000596.2	3484	5660897147	4462853966	-1198043181
2190674	IGFBP5	NM_000599.2	3488	7381847514	4914478002	-2467369512
5420386	IL13RA2	NM_000640.2	3598	5698796275	4407588875	-1291207401
290402	IL2RB	NM_000878.2	3560	6712667387	5611796389	-1100870998
4040576	IL6	NM_000600.1	3569	793655082	6730099261	-1206451558
1980309	IL8	NM_000584.2	3576	1184515098	9744640802	-2100510178
2070039	INSIG2	NM_016133.2	51141	8772100771	7730539465	-1041561307
3930750	IRAK2	NM_001570.3	3656	8863675866	7772546876	-109112899
2570402	KIF5C	NM_004522.1	3800	6318953181	5292897943	-1026055239
5720184	KLF10	NM_005655.1	7071	8010305458	6616698887	-1393606571
3460685	KYNU	NM_003937.2	8942	5924464954	4734131482	-1190333471
3120743	LAMP2	NM_013995.1	3920	9956899129	8935858101	-1021041028
6350161	LCP1	NM_002298.2	3936	8084995452	6366937733	-1718057719
5700243	LIN7C	NM_018362.2	55327	6597832162	5303228024	-1294604138
3310762	LOC100129342	XM_001718736.1	100129342	5882289917	485869188	-1023598038
7570768	LOC100129543	XM_001715065.1	100129543	682445227	567363442	-115081785
1770347	LOC100130311	XM_001724111.1	100130311	7109414949	473698651	-2372428439
1050474	LOC100133111	XM_001716637.1	100133111	5720809368	4646941753	-1073867615
6840646	LOC100134002	XM_001714782.1	100134002	5857626298	4660965645	-1196660653
4670703	LOC221710	XM_927609.1	221710	7337935878	6115516238	-122241964
160056	LOC285423	XM_938311.1	285423	5774448832	4662220389	-1112228443
6130040	LOC388282	XM_945891.1	388282	5750553198	4675240397	-1075312801
1980369	LOC401152	NM_001001701.1	401152	7874890424	5963133754	-191175667
6580398	LOC401805	XR_038835.1	401805	8094263552	6883684418	-1210579133
7200474	LOC441155	XM_943614.1	441155	5874934823	485869188	-1016242943
940014	LOC441455	XR_041340.1	441455	6015364474	4865145757	-1150218717
6350630	LOC643722	XM_928011.1	643722	5787558471	4604551933	-1183006537
4810598	LOC644037	XR_038280.1	644037	710234535	608926956	-101307579
6580544	LOC644774	XM_927868.1	644774	1156811536	105658972	-1002218151
70121	LOC645638	XR_040455.1	645638	6741941592	5329738043	-1412203549
430477	LOC647481	XM_936545.1	647481	7264772911	6256165386	-1008607525
5690068	LOC652388	XM_941821.1	652388	7077725872	5723538215	-1354187657
1940131	LOC653569	XM_928141.1	653569	5683470225	4602224264	-1081245961
7320707	LOC654103	XM_939368.1	654103	8313836297	7266179411	-1047656886
1070519	LOC654126	XM_945981.1	654126	548680293	4462853966	-1023948964
1070075	LOC654135	XM_945932.1	654135	5983227487	4809812616	-1173414871
1980241	LOC728188	XM_001126103.2	728188	1062341076	9494726018	-1128684742
5910079	LOC728226	XM_927596.1	728226	6268382099	5076604518	-1191777581
5130592	LOC728701	XM_001128647.2	728701	5570173919	4355933435	-1214240485
4180397	LOC729020	XM_001725597.1	729020	6107169135	5023989071	-1083180064
2680431	LOC731002	XM_936992.1	731002	5545893932	4537145056	-1008748876
3940017	LOX	NM_002317.3	4015	8925658891	6815514022	-2110144868
6290328	MAFG	NM_002359.2	4097	6516254826	5510367507	-1005887319
4280373	MAG	NM_080600.1	4099	5589633288	4531122533	-1058510755
510288	MFSD1	NM_022736.1	64747	8920308802	7091014346	-1829294456
1010240	MIER2	NM_017550.1	54531	6444355746	5327193343	-1117162403
580551	MIR23B	NR_029664.1	407011	5813429215	4774909268	-1038519947
2710328	MLKL	XM_936963.1	197259	5670812775	4591899811	-1078912964
2630474	MLLT11	NM_006818.3	10962	7868576925	6736540014	-1132036911
7400400	MMP3	NM_002422.3	4314	6177124617	5097803357	-1079321259
240156	MORC3	NM_015358.1	23515	5951524885	4633295023	-1318229862
6620528	MT1X	NM_005952.2	4501	1344908224	1223295605	-1216126183
1430653	MTX3	NM_001010891.1	345778	773748536	6048437158	-1689048203
4390347	NBR1	NM_005899.2	4077	608926956	506250246	-10267671
1230070	NDRG1	NM_006096.2	10397	1381101691	1186760123	-1943415679
4060438	NDUFA4L2	NM_020142.3	56901	6010337552	4418846788	-1591490765
3390731	NFX1	NM_147133.1	4799	64964177	5374449029	-1121968671
70463	NOL3	NM_003946.3	8996	6839647311	5836326984	-1003320327
1430450	NOMO1	NM_173614.2	23420	6963881047	5550479365	-1413401682
1450615	OPA3	NM_025136.1	80207	567363442	4635758148	-1037876272
7570379	P4HA2	NM_001017974.1	8974	6158563375	5142020201	-1016543173
6130615	PARP3	NM_001003931.1	10039	6786403019	5670812775	-1115590244
6620020	PAX7	NM_002584.1	5081	5774448832	4685844179	-1088604653
2750025	PEX19	NM_002857.2	5824	8280586157	6564305083	-1716281074
7400653	PFKFB4	NM_004567.2	5210	9509696249	8210599296	-1299096953
3990273	PGAM4	XM_926168.1	441531	1135071006	1027401141	-1076698647
1050168	PI3	NM_002638.2	5266	7350366459	6085025426	-1265341034
2450431	PIK3C2A	NM_002645.1	5286	7041497142	5990620202	-105087694
50538	PIM3	XM_938171.1	415116	6501203545	5304922051	-1196281495
3710044	PLAT	NM_000930.2	5327	8610324333	7341498415	-1268825917
5360670	PLAU	NM_002658.2	5328	1166701625	1064379776	-1023218484
3850064	PLCXD1	NM_018390.1	55344	7515583202	5957340981	-1558242221
5130039	PLEKHJ1	NM_018049.1	55111	616561466	5149101603	-1016513057
1030630	PPAP2A	NM_003711.2	8611	6487200215	5404362351	-1082837864
6100128	PPM1A	NM_177951.1	5494	5577683428	4475513227	-1102170201
1070747	PROKR2	NM_144773.2	128674	5720809368	4371574377	-1349234991
1740408	PSG2	NM_031246.1	5670	6481964164	5374449029	-1107515135
4120243	PSG9	NM_002784.2	5678	7220718882	5928023438	-1292695444
4200414	PSPC1	XM_930623.1	55269	7727479451	6595223248	-1132256204
1820632	PTGS2	NM_000963.1	5743	7703109047	6383448658	-131966039
7050136	RAB22A	NM_020673.2	57403	8377580185	7077992844	-129958734
7150678	RAB8A	NM_005370.4	4218	9783301464	8580862303	-1202439161
10593	REEP3	NM_001001330.1	221035	5626401942	455997865	-1066423292
1430424	RFFL	NM_001017368.1	117584	8254958704	7142466596	-1112492108
3450041	RNF114	NM_018683.3	55905	9153641214	7995400882	-1158240333
2710541	RNF4	NM_002938.2	6047	7951198476	6918686833	-1032511643
70112	SCML2	NM_006089.1	10389	6034198627	4655840319	-1378358308
6280168	SERPINA3	NM_001085.4	12	1010752469	907477088	-1032753805
1410209	SGK1	NM_005627.3	6446	8806663054	7670551491	-1136111563
3890402	SLC25A24	NM_013386.2	29957	7168774452	5521267504	-1647506948
4590370	SLC2A1	NM_006516.1	6513	1136852567	9945202693	-1423322979
7160138	SLC35C2	NM_173179.2	51006	5507242593	4445906083	-106133651
7560377	SLC37A3	NM_207113.1	84255	6104026481	498923246	-1114794021
4250670	SLC43A3	NM_199329.1	29015	7941547727	6887344992	-1054202734
6020402	SMS	NM_004595.2	6611	1193536221	1093460142	-1000760788
2260437	SNORA68	NR_000012.1	26780	5567158583	4549452198	-1017706385
3420373	SOD2	NM_001024466.1	6648	7698254641	6671508596	-1026746044
1190670	SPAG4	NM_003116.1	6676	6945855876	5857004215	-1088851661
360500	SRGN	NM_002727.2	5552	6670446726	5646616336	-102383039
2650730	STC1	NM_003155.2	6781	1026793977	9048582794	-121935698
6760037	SYTL2	NM_206929.1	54843	7132733171	6131038074	-1001695097
4070575	TACSTD1	NM_002354.1	4072	8056557549	7040401578	-1016155971
780270	TIMP2	NM_003255.4	7077	110585906	925026337	-1808327234
1090326	TIMP4	NM_003256.2	7079	7114629445	5784945929	-1329683516
2900279	TMEM75	NM_001037234.1	641384	6305335934	4392181421	-1913154512
2640301	TNF	NM_000594.2	7124	7814968238	6653707905	-1161260333
6520725	TNFRSF14	NM_003820.2	8764	7126551738	5974076451	-1152475287
4830471	TNIP3	NM_024873.2	79931	6331547686	4911141377	-1420406309
2510014	TNPO1	NM_153188.1	3842	7908604015	69037036	-1004900415
6220278	TSPAN14	NM_030927.1	81619	7309569172	5870010592	-143955858
2630356	TUBGCP2	NM_006659.1	10844	8940563806	7694777179	-1245786627
4850398	TXNDC5	NM_022085.3	81567	834578314	7344164557	-1001618583
6020195	UBC	NM_021009.3	7316	6291128433	4921170237	-1369958196
3360546	UBE2W	NM_018299.2	55284	7564036706	6548208577	-1015828129
5560482	UBQLN2	NM_013444.2	29978	8479013071	6224680997	-2254332073
3170592	UGCGL1	NM_020120.2	56886	5807003923	4754244967	-1052758956
5220491	VGLL4	NM_014667.1	9686	8020620016	677558007	-1245039946
3400612	WDFY1	NM_020830.3	57590	9323640742	7741030105	-1582610637
2190364	WDR13	NM_017883.3	64743	7006580854	5887172637	-1119408217
6960576	WDR23	NM_025230.3	80344	6261816727	5231999593	-1029817133
4280048	WFDC3	NM_181522.1	140686	744572013	6268849913	-1176870218
2690278	ZBTB25	NM_006977.2	7597	6539704849	543711248	-1102592369
5870156	ZCCHC4	XM_944874.1	29063	5746531595	4703392113	-1043139482
2490333	ZNF467	NM_207336.1	168544	6038594694	4949832312	-1088762383
6250730	ZP1	NM_207341.2	22917	5791468131	4670001045	-1121467087

## Sheet: downregulated by BCL6
ProbeID	TargetID	SEARCH_KEY	ENTREZ_GENE_ID	log2siSCR	log2siBCL6	log2FC
1110025	ABAT	NM_020686.3	18	4722811622	7359619609	2636807986
6380747	ANKRD32	NM_032290.2	84250	5003090379	6019818202	1016727823
1240424	ANP32A	NM_006305.2	8125	5577683428	6697456996	1119773569
780594	AQP11	NM_173039.1	282679	5620576172	6661567281	1040991109
3710195	ARL17B	NM_001039083.3	641522	5998539495	7044778849	1046239354
5050575	ASB13	NM_024701.2	79754	5704330134	6791946951	1087616817
6900722	ATP5S	NM_015684.2	27109	6402333447	7448200619	1045867172
4880482	BLMH	NM_000386.2	642	7295403504	8487378642	1191975138
4890093	BRP44L	NM_016098.1	51660	8236182644	9285830353	104964771
2340059	C16ORF53	NM_024516.2	79447	7578072276	9351127417	1773055142
20131	C17ORF65	NM_178542.3	339201	4809812616	5944514478	1134701862
1430435	C3ORF34	NM_032898.2	84984	6838702295	8048951109	1210248814
7650703	C4ORF48	NM_001141936.1	401115	678444124	784853034	1064089101
1230047	CBS	NM_000071.1	875	7259133162	8357486931	109835377
2750192	CCDC90B	NM_021825.3	60492	6287900832	7384440188	1096539356
3850292	CHCHD4	NM_144636.1	131474	8059534855	9360485445	130095059
1770400	COMMD8	NM_017845.2	54951	8478305317	9644190145	1165884828
3870670	CRSP9	NM_004270.3	9443	5122577983	6251438967	1128860984
1240674	DENND1A	NM_024820.2	57706	5108417278	6183589854	1075172577
5130091	DICER1	NM_030621.2	23405	6139248608	8031412873	1892164266
1500661	DLEU2	XR_001514.1	8847	6900386301	7967140967	1066754666
4590553	E2F1	NM_005225.1	1869	5951524885	7006580854	1055055969
3840437	EAF1	NM_033083.5	85403	6473871408	7538656152	1064784743
1430528	EIF2C3	NM_177422.1	192669	5030981754	6092444491	1061462737
1260241	EIF4EBP2	NM_004096.3	1979	6188543473	8209137526	2020594053
2900543	ENDOG	NM_004435.2	2021	5870010592	6887344992	10173344
1500487	ENOX2	NM_006375.2	10495	4985778256	6036398335	1050620079
5360731	FAM119A	NM_145280.3	151194	5292897943	6580223976	1287326033
7200414	FAM86B1	XM_941563.1	85002	5608858789	6772614211	1163755422
6770397	FAM98B	NM_173611.2	283742	5080134282	6428531121	1348396839
4760328	FASTK	NM_006712.3	10922	570156577	6833967909	1132402139
4390239	FBXW4	NM_022039.3	6468	5088929079	6101927568	1012998488
5560725	FGF17	NM_003867.2	8822	4604551933	5666572111	1062020177
2070095	HIF1AN	NM_017902.1	55662	6261816727	7455205599	1193388872
1430133	HS.148448	Hs.148448	NA	4883095217	5918514752	1035419535
3290609	HS.193784	Hs.193784	NA	5039697363	6418446441	1378749078
240392	HS.202577	Hs.202577	NA	6446011443	7532045772	1086034329
780706	HS.287137	Hs.287137	NA	4464515791	549626956	1031753769
1580192	HS.377419	Hs.377419	NA	4757168084	6661567281	1904399197
610484	HS.390542	Hs.390542	NA	5010042541	6298020503	1287977962
3290102	IP6K3	NM_054111.4	117283	4667397036	5693241839	1025844804
5890253	ITGB3BP	NM_014288.3	23421	6222750588	7874890424	1652139836
60719	KCNJ2	NM_000891.2	3759	4557853511	5561111076	1003257564
3890164	KIAA0895	NM_015314.1	23366	5013524055	6138736816	112521276
6370309	KRT75	NM_004693.1	9119	535765965	6468179347	1110519697
4290068	LOC100127922	XR_038410.1	100127922	4658397745	5761220755	110282301
1170575	LOC100129882	XM_001716882.1	100129882	845042857	1065748389	2207055316
6960070	LOC100130289	XR_039781.1	100130289	5259945916	6694674159	1434728243
4210520	LOC100132913	XM_001715265.1	100132913	4503225267	5646616336	1143391068
5560747	LOC100133803	XM_001719081.1	100133803	7462994654	8603571476	1140576823
6370020	LOC286310	XM_938575.1	286310	4677875723	58724748	1194599076
3930707	LOC346950	XM_294473.2	346950	714934276	8219096896	1069754136
5090484	LOC389342	XM_945799.3	389342	8227424401	9283054093	1055629692
5570519	LOC401397	Hs.117929	401397	100428703	1111906121	1076190914
4280093	LOC440157	NM_001013701.1	440157	5342469883	6431041314	1088571431
3130189	LOC440498	XM_498704.2	440498	6036398335	713170477	1095306435
7330491	LOC641844	XR_018036.2	641844	9306255872	1030769628	1001440408
6590750	LOC644380	XM_929628.1	644380	4831658261	5832535883	1000877622
2480008	LOC644419	XM_932175.1	644419	4800581536	5857004215	105642268
7050017	LOC644860	XR_039515.1	644860	5152641647	6418446441	1265804794
4040131	LOC646909	XR_039057.1	646909	4897860275	6123815326	1225955051
6220138	LOC647850	XM_936910.1	647850	4549452198	5623491792	1074039594
1940754	LOC648931	XM_943512.1	648931	4706135671	5757229607	1051093936
7560408	LOC649305	XM_938372.1	649305	4525186325	5539767667	1014581342
1230066	LOC650826	XM_945912.1	650826	5010042541	6192987235	1182944694
6550112	LOC652645	XM_942200.1	652645	4675240397	5750553198	1075312801
6450524	LOC653737	XM_929340.3	653737	5800550799	7108369785	1307818985
3850008	LOC654189	XM_942687.1	654189	6263695598	7281097364	1017401766
2340195	LOC728207	XR_037075.1	728207	5461314276	6720554906	125924063
6420441	LOC728416	XM_001127426.2	728416	6188543473	7340608605	1152065132
3400086	LOC729082	XR_040993.1	729082	7497134947	9202699821	1705564875
3450110	LOC730134	XM_001719031.1	730134	4585116208	5617655071	1032538863
730709	LOC730525	NM_199327.1	730525	5983227487	700938307	1026155584
2690475	MAP4K5	NM_006575.3	11183	6985104246	8170101349	1184997102
5360719	MAPK9	NM_002752.3	5601	6112912953	7114629445	1001716492
6380438	MCM3APAS	NR_002776.1	114044	5129660293	6650121258	1520460965
4390446	MGC3731	NM_024313.1	79159	650239753	7533409211	1031011681
2650593	MLL5	NM_182931.1	55904	4714427798	5737107499	10226797
5390376	MOV10L1	NM_018995.1	54456	4683177626	5739806467	1056628841
3440053	MPRIP	NM_201274.2	23164	5965444384	7348154553	138271017
610377	MSH2	NM_000251.1	4436	4765995542	5843880081	1077884538
3520370	MSI2	NM_138962.2	124540	5350911081	6504385311	115347423
4610022	NCRNA00081	NR_024142.1	92482	6331547686	7447374263	1115826578
4860563	NDUFAB1	NM_005003.2	4706	1067753045	1197645143	129892098
6110167	NPAS2	NM_002518.3	4862	5088929079	6386469641	1297540561
110653	NPL	NM_030769.1	80896	4825373699	6112391732	1287018033
6840347	OGFRL1	NM_024576.3	79627	7432000679	862675015	1194749471
4010162	OPRD1	NM_000911.3	4985	470206105	5753227669	105116662
3610681	OR2A9P	NR_002157.1	441295	4911141377	6135149182	1224007805
4060349	PBEF1	NM_182790.1	10135	4675240397	5696021637	102078124
580187	PDE8B	NM_001029851.1	8622	471721225	5933934707	1216722457
4150465	POLR3E	NM_018119.2	55718	7494537262	8504164337	1009627075
4200612	PPIL1	NM_016059.3	51645	7807259635	8942251177	1134991542
7400309	RAD51L1	NM_002877.4	5890	5111956713	6212086919	1100130206
630240	RASSF6	NM_177532.3	166824	504320513	6110304962	1067099832
3890132	ROR1	NM_005012.1	4919	506250246	6077568014	1015065553
3140521	SCARNA14	NR_004388.1	692149	4822244174	6242892194	1420648019
2710427	SCARNA23	NR_003007.1	677773	4672615501	5676450797	1003835296
3990551	SCARNA27	NR_003703.1	100124533	4518381829	5726262046	1207880217
3390139	SDHD	NM_003002.1	6392	8888546024	1000770738	1119161359
4890021	SEPT3	NM_019106.4	55964	5080134282	6167622999	1087488718
6580184	SERHL	XM_940594.1	94009	4518381829	570156577	1183183941
2940706	SETD3	NM_032233.2	84193	9689448046	1111301621	1423568167
2690528	SHMT1	NM_148918.1	6470	6610806432	787964577	1268839338
7550192	SLC16A10	NM_018593.3	117247	5617655071	6664414654	1046759583
4010452	SLC38A6	NM_153811.1	145389	6242892194	725654089	1013648696
1110521	SNCB	NM_003085.3	6620	4672615501	5784945929	1112330428
6510156	SNORA12	NR_002954.1	677800	8956768777	1009471799	1137949209
6770673	SOCS2	NM_003877.3	8835	5842624158	7077992844	1235368686
6420164	ST6GALNAC2	NM_006456.1	10610	5080134282	6094557234	1014422953
2470379	STAP2	XM_939590.1	55620	5374449029	6377387647	1002938619
4050056	TBC1D16	NM_019020.2	125058	6631325585	8117046711	1485721126
1070356	TFEC	NM_012252.2	22797	494304062	6017593056	1074552436
3870193	TMEM180	NM_024789.3	79847	5039697363	6210139574	1170442211
2970474	TSEN15	NM_001127394.2	116461	624003198	7302275229	1062243249
1090221	VPS37A	NM_152415.1	137492	6324364295	741286793	1088503635
4010075	XPR1	NM_004736.2	9213	9102330606	1012212939	1019798782
7550523	ZNF618	XM_928246.1	114991	4514536983	5797961403	1283424421
1090280	ZNF680	NM_178558.2	340252	506954988	6268849913	1199300033

## Sheet: IPA genes regulated by both
Ingenuity Canonical Pathways	-log(p-value)	Ratio	Molecules
IL-17 Signaling	4.25E00	5.41E-02	IL8,MMP3,PTGS2,IL6
Granulocyte Adhesion and Diapedesis	2.79E00	2.25E-02	IL8,MMP3,CLDN1,CXCL2
Agranulocyte Adhesion and Diapedesis	2.7E00	2.12E-02	IL8,MMP3,CLDN1,CXCL2
Atherosclerosis Signaling	2.28E00	2.19E-02	IL8,MMP3,IL6
Glycine Biosynthesis I	2.23E00	1.67E-01	SHMT1
Role of Hypercytokinemia/hyperchemokinemia in the Pathogenesis of Influenza	2.14E00	4.55E-02	IL8,IL6
Role of IL-17F in Allergic Inflammatory Airway Diseases	2.12E00	4.17E-02	IL8,IL6
Hepatic Fibrosis / Hepatic Stellate Cell Activation	2.11E00	2.05E-02	IL8,IGFBP5,IL6
Hematopoiesis from Pluripotent Stem Cells	2.01E00	3.17E-02	IL8,IL6
Mitochondrial Dysfunction	1.99E00	1.56E-02	SOD2,SDHD,NDUFA4L2
Role of IL-17A in Arthritis	1.97E00	3.17E-02	IL8,PTGS2
Role of Cytokines in Mediating Communication between Immune Cells	1.95E00	3.64E-02	IL8,IL6
TREM1 Signaling	1.89E00	2.82E-02	IL8,IL6
Acute Phase Response Signaling	1.88E00	1.67E-02	SOD2,CFB,IL6
dTMP De Novo Biosynthesis	1.84E00	7.14E-02	SHMT1
Superpathway of Serine and Glycine Biosynthesis I	1.76E00	5.56E-02	SHMT1
Superoxide Radicals Degradation	1.76E00	1.25E-01	SOD2
Folate Polyglutamylation	1.76E00	5.56E-02	SHMT1
Inositol Pyrophosphates Biosynthesis	1.69E00	6.25E-02	IP6K3
Airway Pathology in Chronic Obstructive Pulmonary Disease	1.64E00	1.11E-01	IL8
Prostanoid Biosynthesis	1.59E00	6.67E-02	PTGS2
Folate Transformations I	1.59E00	3.12E-02	SHMT1
Bladder Cancer Signaling	1.56E00	2.17E-02	IL8,MMP3
Glycine Betaine Degradation	1.54E00	4.35E-02	SHMT1
Communication between Innate and Adaptive Immune Cells	1.54E00	1.83E-02	IL8,IL6
Colorectal Cancer Metastasis Signaling	1.48E00	1.15E-02	MMP3,PTGS2,IL6
HGF Signaling	1.46E00	1.89E-02	PTGS2,IL6
Role of IL-17A in Psoriasis	1.43E00	7.69E-02	IL8
Fatty Acid α-oxidation	1.4E00	4.76E-02	PTGS2
Glucocorticoid Receptor Signaling	1.39E00	1.02E-02	IL8,PTGS2,IL6
IL-6 Signaling	1.35E00	1.61E-02	IL8,IL6
LXR/RXR Activation	1.31E00	1.47E-02	PTGS2,IL6
Differential Regulation of Cytokine Production in Macrophages and T Helper Cells by IL-17A and IL-17F	1.29E00	5.56E-02	IL6
Role of Macrophages, Fibroblasts and Endothelial Cells in Rheumatoid Arthritis	1.23E00	8.93E-03	IL8,MMP3,IL6
Hepatic Cholestasis	1.21E00	1.14E-02	IL8,IL6
Polyamine Regulation in Colon Cancer	1.21E00	3.45E-02	AZIN1
TCA Cycle II (Eukaryotic)	1.19E00	2.44E-02	SDHD
Tumoricidal Function of Hepatic Natural Killer Cells	1.17E00	4.17E-02	SRGN
IL-17A Signaling in Gastric Cells	1.15E00	0.04	IL8
Role of JAK family kinases in IL-6-type Cytokine Signaling	1.15E00	3.7E-02	IL6
IL-15 Production	1.12E00	3.23E-02	IL6
MIF-mediated Glucocorticoid Regulation	1.04E00	2.38E-02	PTGS2
Complement System	1.04E00	2.86E-02	CFB
Oncostatin M Signaling	1.02E00	2.86E-02	MMP3
IL-17A Signaling in Fibroblasts	1.01E00	2.5E-02	IL6
IL-8 Signaling	9.86E-01	9.62E-03	IL8,PTGS2
Notch Signaling	9.78E-01	2.33E-02	MAG
Inhibition of Matrix Metalloproteases	9.68E-01	2.5E-02	MMP3
MIF Regulation of Innate Immunity	9.47E-01	0.02	PTGS2
Leukocyte Extravasation Signaling	9.45E-01	9.66E-03	MMP3,CLDN1
Graft-versus-Host Disease Signaling	0.9	0.02	IL6
Role of Osteoblasts, Osteoclasts and Chondrocytes in Rheumatoid Arthritis	8.74E-01	8.33E-03	MMP3,IL6
Eicosanoid Signaling	7.8E-01	1.23E-02	PTGS2
Activation of IRF by Cytosolic Pattern Recognition Receptors	7.74E-01	1.39E-02	IL6
IL-17A Signaling in Airway Cells	7.68E-01	1.37E-02	IL6
PXR/RXR Activation	7.5E-01	1.15E-02	IL6
Role of MAPK Signaling in the Pathogenesis of Influenza	7.5E-01	1.43E-02	PTGS2
JAK/Stat Signaling	7.5E-01	1.43E-02	IL6
IL-10 Signaling	7.44E-01	1.28E-02	IL6
T Helper Cell Differentiation	7.38E-01	1.39E-02	IL6
Chemokine Signaling	7.38E-01	1.37E-02	MPRIP
Small Cell Lung Cancer Signaling	7.27E-01	1.12E-02	PTGS2
PEDF Signaling	7.27E-01	1.28E-02	SOD2
VDR/RXR Activation	6.9E-01	1.23E-02	IGFBP5
Regulation of Actin-based Motility by Rho	6.71E-01	1.12E-02	MPRIP
Altered T Cell and B Cell Signaling in Rheumatoid Arthritis	6.53E-01	1.09E-02	IL6
Crosstalk between Dendritic Cells and Natural Killer Cells	6.35E-01	1.04E-02	IL6
HMGB1 Signaling	6.23E-01	1.01E-02	IL8
PPAR Signaling	6.19E-01	9.52E-03	PTGS2
SAPK/JNK Signaling	6.15E-01	9.71E-03	MAP4K5
Role of Pattern Recognition Receptors in Recognition of Bacteria and Viruses	6.11E-01	9.43E-03	IL6
IGF-1 Signaling	6.07E-01	9.52E-03	IGFBP5
Cholecystokinin/Gastrin-mediated Signaling	5.92E-01	9.43E-03	PTGS2
HIF1α Signaling	5.84E-01	9.26E-03	MMP3
Pancreatic Adenocarcinoma Signaling	5.7E-01	8.33E-03	PTGS2
Role of Tissue Factor in Cancer	5.57E-01	8.62E-03	IL8
Corticotropin Releasing Hormone Signaling	5.5E-01	7.25E-03	PTGS2
CCR3 Signaling in Eosinophils	5.44E-01	7.81E-03	MPRIP
RhoA Signaling	5.37E-01	8.33E-03	MPRIP
PI3K/AKT Signaling	5.19E-01	6.94E-03	PTGS2
Cellular Effects of Sildenafil (Viagra)	5.02E-01	6.71E-03	MPRIP
Ovarian Cancer Signaling	4.91E-01	6.99E-03	PTGS2
Aryl Hydrocarbon Receptor Signaling	4.73E-01	6.17E-03	IL6
Regulation of eIF4 and p70S6K Signaling	4.53E-01	5.71E-03	EIF4EBP2
Tight Junction Signaling	4.42E-01	6.21E-03	CLDN1
Cdc42 Signaling	4.24E-01	5.62E-03	MPRIP
Endothelin-1 Signaling	4.04E-01	5.29E-03	PTGS2
PPARα/RXRα Activation	3.94E-01	5.18E-03	IL6
Sertoli Cell-Sertoli Cell Junction Signaling	3.92E-01	5.1E-03	CLDN1
Dendritic Cell Maturation	3.9E-01	4.78E-03	IL6
NRF2-mediated Oxidative Stress Response	3.87E-01	5.21E-03	SOD2
Regulation of the Epithelial-Mesenchymal Transition Pathway	3.85E-01	5.21E-03	LOX
Role of NFAT in Cardiac Hypertrophy	3.83E-01	4.78E-03	IL6
Superpathway of Inositol Phosphate Compounds	3.76E-01	4.35E-03	IP6K3
ILK Signaling	3.74E-01	5.15E-03	PTGS2
Thrombin Signaling	3.67E-01	4.81E-03	MPRIP
Integrin Signaling	3.57E-01	4.81E-03	MPRIP
Actin Cytoskeleton Signaling	3.31E-01	4.18E-03	MPRIP
Systemic Lupus Erythematosus Signaling	3.18E-01	0.004	IL6
Cardiac Hypertrophy Signaling	3.17E-01	4.05E-03	IL6
Phospholipase C Signaling	3.03E-01	3.8E-03	MPRIP
Xenobiotic Metabolism Signaling	2.44E-01	3.33E-03	IL6

## Sheet: IPA genes upregulated by both
Ingenuity Canonical Pathways	-log(p-value)	Ratio	Molecules
IL-17 Signaling	4.67E00	5.41E-02	IL8,MMP3,PTGS2,IL6
Granulocyte Adhesion and Diapedesis	3.29E00	2.25E-02	IL8,MMP3,CLDN1,CXCL2
Agranulocyte Adhesion and Diapedesis	3.19E00	2.12E-02	IL8,MMP3,CLDN1,CXCL2
Hematopoiesis from Pluripotent Stem Cells	2.67E00	3.17E-02	IL8,IL6
Atherosclerosis Signaling	2.6E00	2.19E-02	IL8,MMP3,IL6
Hepatic Fibrosis / Hepatic Stellate Cell Activation	2.43E00	2.05E-02	IL8,IGFBP5,IL6
Role of Hypercytokinemia/hyperchemokinemia in the Pathogenesis of Influenza	2.4E00	4.55E-02	IL8,IL6
Role of IL-17F in Allergic Inflammatory Airway Diseases	2.4E00	4.17E-02	IL8,IL6
Role of Cytokines in Mediating Communication between Immune Cells	2.2E00	3.64E-02	IL8,IL6
Acute Phase Response Signaling	2.19E00	1.67E-02	SOD2,CFB,IL6
Role of IL-17A in Arthritis	2.17E00	3.17E-02	IL8,PTGS2
TREM1 Signaling	2.15E00	2.82E-02	IL8,IL6
Communication between Innate and Adaptive Immune Cells	1.9E00	1.83E-02	IL8,IL6
Superoxide Radicals Degradation	1.86E00	1.25E-01	SOD2
Colorectal Cancer Metastasis Signaling	1.8E00	1.15E-02	MMP3,PTGS2,IL6
Bladder Cancer Signaling	1.78E00	2.17E-02	IL8,MMP3
Airway Pathology in Chronic Obstructive Pulmonary Disease	1.74E00	1.11E-01	IL8
Prostanoid Biosynthesis	1.69E00	6.67E-02	PTGS2
Glucocorticoid Receptor Signaling	1.69E00	1.02E-02	IL8,PTGS2,IL6
HGF Signaling	1.67E00	1.89E-02	PTGS2,IL6
Role of Macrophages, Fibroblasts and Endothelial Cells in Rheumatoid Arthritis	1.57E00	8.93E-03	IL8,MMP3,IL6
IL-6 Signaling	1.54E00	1.61E-02	IL8,IL6
Role of IL-17A in Psoriasis	1.53E00	7.69E-02	IL8
Fatty Acid α-oxidation	1.53E00	4.76E-02	PTGS2
LXR/RXR Activation	1.5E00	1.47E-02	PTGS2,IL6
Hepatic Cholestasis	1.42E00	1.14E-02	IL8,IL6
Mitochondrial Dysfunction	1.39E00	1.04E-02	SOD2,NDUFA4L2
Differential Regulation of Cytokine Production in Macrophages and T Helper Cells by IL-17A and IL-17F	1.39E00	5.56E-02	IL6
Polyamine Regulation in Colon Cancer	1.31E00	3.45E-02	AZIN1
Tumoricidal Function of Hepatic Natural Killer Cells	1.27E00	4.17E-02	SRGN
IL-17A Signaling in Gastric Cells	1.25E00	0.04	IL8
Role of JAK family kinases in IL-6-type Cytokine Signaling	1.25E00	3.7E-02	IL6
IL-15 Production	1.22E00	3.23E-02	IL6
IL-8 Signaling	1.18E00	9.62E-03	IL8,PTGS2
MIF-mediated Glucocorticoid Regulation	1.15E00	2.38E-02	PTGS2
Complement System	1.15E00	2.86E-02	CFB
Leukocyte Extravasation Signaling	1.14E00	9.66E-03	MMP3,CLDN1
Oncostatin M Signaling	1.12E00	2.86E-02	MMP3
IL-17A Signaling in Fibroblasts	1.11E00	2.5E-02	IL6
Notch Signaling	1.09E00	2.33E-02	MAG
Inhibition of Matrix Metalloproteases	1.08E00	2.5E-02	MMP3
Graft-versus-Host Disease Signaling	1.07E00	0.02	IL6
Role of Osteoblasts, Osteoclasts and Chondrocytes in Rheumatoid Arthritis	1.06E00	8.33E-03	MMP3,IL6
MIF Regulation of Innate Immunity	1.06E00	0.02	PTGS2
Activation of IRF by Cytosolic Pattern Recognition Receptors	8.89E-01	1.39E-02	IL6
Eicosanoid Signaling	8.89E-01	1.23E-02	PTGS2
T Helper Cell Differentiation	8.76E-01	1.39E-02	IL6
PXR/RXR Activation	8.7E-01	1.15E-02	IL6
IL-17A Signaling in Airway Cells	8.63E-01	1.37E-02	IL6
Role of MAPK Signaling in the Pathogenesis of Influenza	8.57E-01	1.43E-02	PTGS2
JAK/Stat Signaling	8.45E-01	1.43E-02	IL6
IL-10 Signaling	8.39E-01	1.28E-02	IL6
Small Cell Lung Cancer Signaling	8.22E-01	1.12E-02	PTGS2
PEDF Signaling	8.22E-01	1.28E-02	SOD2
Altered T Cell and B Cell Signaling in Rheumatoid Arthritis	7.94E-01	1.09E-02	IL6
VDR/RXR Activation	7.89E-01	1.23E-02	IGFBP5
Crosstalk between Dendritic Cells and Natural Killer Cells	7.32E-01	1.04E-02	IL6
PPAR Signaling	7.27E-01	9.52E-03	PTGS2
Role of Pattern Recognition Receptors in Recognition of Bacteria and Viruses	7.23E-01	9.43E-03	IL6
HMGB1 Signaling	7.15E-01	1.01E-02	IL8
IGF-1 Signaling	7.02E-01	9.52E-03	IGFBP5
HIF1α Signaling	6.86E-01	9.26E-03	MMP3
Cholecystokinin/Gastrin-mediated Signaling	6.86E-01	9.43E-03	PTGS2
Corticotropin Releasing Hormone Signaling	6.64E-01	7.25E-03	PTGS2
Pancreatic Adenocarcinoma Signaling	6.64E-01	8.33E-03	PTGS2
Role of Tissue Factor in Cancer	6.6E-01	8.62E-03	IL8
PI3K/AKT Signaling	6.17E-01	6.94E-03	PTGS2
Ovarian Cancer Signaling	5.86E-01	6.99E-03	PTGS2
Aryl Hydrocarbon Receptor Signaling	5.78E-01	6.17E-03	IL6
Tight Junction Signaling	5.29E-01	6.21E-03	CLDN1
Dendritic Cell Maturation	5.06E-01	4.78E-03	IL6
PPARα/RXRα Activation	5.01E-01	5.18E-03	IL6
Endothelin-1 Signaling	4.97E-01	5.29E-03	PTGS2
Sertoli Cell-Sertoli Cell Junction Signaling	4.82E-01	5.1E-03	CLDN1
Role of NFAT in Cardiac Hypertrophy	4.78E-01	4.78E-03	IL6
NRF2-mediated Oxidative Stress Response	4.74E-01	5.21E-03	SOD2
Regulation of the Epithelial-Mesenchymal Transition Pathway	4.72E-01	5.21E-03	LOX
ILK Signaling	4.66E-01	5.15E-03	PTGS2
Systemic Lupus Erythematosus Signaling	4.51E-01	0.004	IL6
Cardiac Hypertrophy Signaling	4.02E-01	4.05E-03	IL6
Xenobiotic Metabolism Signaling	3.44E-01	3.33E-03	IL6
Protein Kinase A Signaling	2.42E-01	2.49E-03	PTGS2
Axonal Guidance Signaling	2.03E-01	2.12E-03	MAG

## Sheet: IPA genes downregulated by both
Ingenuity Canonical Pathways	-log(p-value)	Ratio	Molecules
Glycine Biosynthesis I	2.67E00	1.67E-01	SHMT1
dTMP De Novo Biosynthesis	2.27E00	7.14E-02	SHMT1
Folate Polyglutamylation	2.27E00	5.56E-02	SHMT1
Superpathway of Serine and Glycine Biosynthesis I	2.19E00	5.56E-02	SHMT1
Inositol Pyrophosphates Biosynthesis	2.12E00	6.25E-02	IP6K3
Folate Transformations I	2.01E00	3.12E-02	SHMT1
Glycine Betaine Degradation	1.97E00	4.35E-02	SHMT1
TCA Cycle II (Eukaryotic)	1.61E00	2.44E-02	SDHD
Chemokine Signaling	1.15E00	1.37E-02	MPRIP
Regulation of Actin-based Motility by Rho	1.07E00	1.12E-02	MPRIP
SAPK/JNK Signaling	1.04E00	9.71E-03	MAP4K5
CCR3 Signaling in Eosinophils	9.42E-01	7.81E-03	MPRIP
RhoA Signaling	9.31E-01	8.33E-03	MPRIP
Cdc42 Signaling	9.03E-01	5.62E-03	MPRIP
Cellular Effects of Sildenafil (Viagra)	0.9	6.71E-03	MPRIP
Mitochondrial Dysfunction	8.54E-01	5.21E-03	SDHD
Regulation of eIF4 and p70S6K Signaling	8.45E-01	5.71E-03	EIF4EBP2
Superpathway of Inositol Phosphate Compounds	7.52E-01	4.35E-03	IP6K3
Thrombin Signaling	7.35E-01	4.81E-03	MPRIP
Integrin Signaling	7.23E-01	4.81E-03	MPRIP
Actin Cytoskeleton Signaling	6.9E-01	4.18E-03	MPRIP
Phospholipase C Signaling	6.72E-01	3.8E-03	MPRIP
